# Supplementary material for: Endothelial Microsomal Prostaglandin E Synthetase-1 Upregulates Vascularity and Endothelial Interleukin-1β in Deteriorative Progression of Experimental Autoimmune Encephalomyelitis
Source: MDPI journal article supplement (doi:10.3390/ijms19113647), 2018-11-19
Supplement: s1 [file s1]

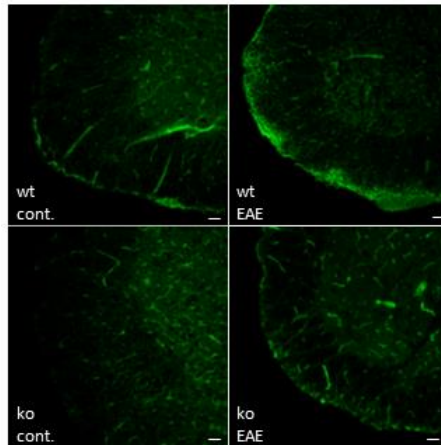

**Supplementary Figure 1.** Distribution of tomato lectin staining in spinal cords. Immunohistochemistry image showing tomato lectin in the spinal cord in wild-type (wt) control, wt experimental autoimmune encephalomyelitis (EAE), microsomal PGE synthase-1-deficient (*mPGES-1*<sup>-/-</sup>) control, and *mPGES-1*<sup>-/-</sup> EAE mice. Scale bar (50  $\mu$ m). wt, wild-type; ko, *mPGES-1*<sup>-/-</sup>; cont., naïve mice; EAE, EAE mice.
